# Supplementary material
Source: publisher figshare collection journal article supplement (https://tandf.figshare.com/ndownloader/files/17851550)
Supplement: Supplementary file 1 [file 17851550]

## Appendix A

| #  | Massive Open Online Course Title                                                    | Platform                     | Offered by                                                                                     |
|----|-------------------------------------------------------------------------------------|------------------------------|------------------------------------------------------------------------------------------------|
| 1  | Introduction to the Science of Cancer                                               | Canvas Network               | The Ohio State University                                                                      |
| 2  | Understanding Common Diseases                                                       | OpenEdXstudy                 | University of Wollongong                                                                       |
| 3  | The Social Context of Mental Health and Illness                                     | Coursera                     | University of Toronto                                                                          |
| 4  | Managing Addiction: A Framework for Successful Treatment                            | EdX                          | University of Adelaide                                                                         |
| 5  | Introduction to Cataract Surgery                                                    | Coursera                     | University of Michigan                                                                         |
| 6  | Histology: Using Microscopy to Study Anatomy and Identify Disease                   | Futurelearn                  | The Open University                                                                            |
| 7  | Talking About Cancer: Reducing Risk, Early Detection, and Mythbusting               | Futurelearn                  | Cancer Research UK                                                                             |
| 8  | Genomic Medicine: Transforming Patient Care in Diabetes                             | Futurelearn                  | University of Exeter                                                                           |
| 9  | The Many Faces of Dementia                                                          | Futurelearn                  | University College London                                                                      |
| 10 | Clinical Kidney, Pancreas and Islet Transplantation                                 | Coursera                     | Leiden University Medical Center                                                               |
| 11 | Diabetes - A Global Challenge                                                       | Coursera                     | University of Copenhagen                                                                       |
| 12 | Diabetes - The Essential Facts                                                      | Coursera                     | University of Copenhagen                                                                       |
| 13 | Well and Able: Improving the Physical Health of People with Intellectual Disability | Coursera                     | University of Queensland                                                                       |
| 14 | Epidemics: the dynamics of Infectious Diseases                                      | Coursera                     | The Pennsylvania State University                                                              |
| 15 | ADHD: Everyday Strategies for Elementary Students                                   | Coursera                     | The State University of New York, University at Buffalo                                        |
| 16 | AIDS: Hope and Fear                                                                 | Coursera                     | University of Michigan                                                                         |
| 17 | In the Footsteps of Zika: Approaching the Unknown                                   | EdX                          | Université de Genève, Institut Pasteur, Université Paris Descartes and Centre Virchow-Villermé |
| 18 | Ebola Virus Disease: An Evolving Epidemic                                           | Coursera                     | Emory University                                                                               |
| 19 | Preventing the Zika virus: Understanding and controlling the Aedes Mosquito         | Futurelearn                  | London School of Hygiene and Tropical Medicine and the Arthropod Control Product               |
| 20 | Easing the burden of obesity and cardiovascular disease                             | Coursera                     | The University of Sydney                                                                       |
| 21 | Organ donation: from death to life                                                  | Coursera                     | University of Cape Town                                                                        |
| 22 | Introduction to breast cancer                                                       | Coursera                     | Yale University                                                                                |
| 23 | Tropical parasitology, protozoans, worms, vectors and human diseases                | Coursera                     | Duke University and Kilimanjaro and Christian Medical University College                       |
| 24 | Bacteria and chronic infections                                                     | Coursera                     | University of Copenhagen                                                                       |
| 25 | Good brain, bad brain, Parkinson's disease                                          | Futurelearn                  | University of Birmingham                                                                       |
| 26 | Understanding Alzheimer's disease: A molecular and genetic approach                 | EdX                          | The University of Texas at San Antonio                                                         |
| 27 | MalariaX: Defeating malaria/ from the genes to the globe                            | EdX                          | Harvard University                                                                             |
| 28 | Better conversations with aphasia                                                   | UCLxTend                     | University College London                                                                      |
| 29 | Clinical management of HIV                                                          | Iversity                     | European AIDS Clinical Society                                                                 |
| 30 | Congenital hypothyroidism, what every primary care provider needs to know           | Stanford Online              | Stanford Medicine                                                                              |
| 31 | Prescription drug misuse and addiction: compassionate care for a complex problem    | Stanford Online              | Stanford Medicine                                                                              |
| 32 | Perspectives on disability                                                          | Open Education by Blackboard | Northern Illinois University                                                                   |
| 33 | Understanding dementia                                                              | desire2Learn                 | The University of Tasmania                                                                     |

## Appendix B

## MOOC Instructional Design Quality Tool

### - CourseScan extended with Goal-Setting Items -

This tool was assembled to study the instructional design quality of MOOCs, based on a 10 principle framework named CourseScan by Margaryan, Bianco and Littlejohn (2015), published in *Computers & Education*. Goal-setting was added as 11<sup>th</sup> principle. In addition information about course presentation and organization can be gathered with the tool. The tool consists of 3 sections:

A - Researcher information and course information that can be gathered on the course information page

B - Course information that can be gathered once one is enrolled in the course

C - Instructional design principles: goal-setting, problem-centeredness, authentic resources, activation, application, integration, differentiation, demonstration, collective knowledge, feedback and collaboration

(Assembled by Renée Hendriks, Center for Innovation in Medical Education, Leiden University Medical Center, The Netherlands, 2019)

### SECTION A

*This section concerns the information page of the course*

A1 Initials of researcher:

A2 Course name:

A3 Course startdate/Self-paced:

A4 Date of analysis:

A5 Course website:

A6 Course platform:

- |                                      |                                                    |
|--------------------------------------|----------------------------------------------------|
| <input type="radio"/> Coursera       | <input type="radio"/> Independent                  |
| <input type="radio"/> EdX            | <input type="radio"/> OpenEx                       |
| <input type="radio"/> Iversity       | <input type="radio"/> Open2study                   |
| <input type="radio"/> Futurelearn    | <input type="radio"/> Open Education by Blackboard |
| <input type="radio"/> Canvas Network | <input type="radio"/> Other:                       |

A7 Does the course information page specify the learner population that will engage in the course?

- ☐ Yes  
☐ No

A8 Does the course information page specify the change that needs to be promoted in the skill set of the learner population?

- ☐ Yes
- ☐ No

A9 Are distal goals described on the course information page (at the end of this course...)?

- ☐ No
- ☐ Yes, namely:

A10 Are the course enrollment requirements clearly outlined on the course information page?

- ☐ Yes
- ☐ No

A11 Are the course completion requirements clearly outlined on the course information page?

- ☐ Yes
- ☐ No

A12 Is the course description on the course information page clear?

- ☐ Yes
- ☐ No

*Please enter the course for the following sections*

SECTION B

Likert-scale items scoring system for section B and C:

- **None.** The course does not reflect a given principle at all.
- **To some extent.** Serious gaps were found, the course reflects a given principle in less than 50% of the included teaching modes.
- **To large extent.** The course reflects a given principle mostly sufficient, in 51% to 80% of included teaching modes.
- **To very large extent.** The course reflects a given principle to complete satisfaction, in 81% to 100% of included teaching modes.
- **Not applicable.** An item is absent, for example when group work is absent in a course, all questions regarding the composition of the group are not applicable.
- **No information.** No information is available to determine if a given principle is reflected in the course.

---

B1 Is the course description clear?

- ☐ Yes  
☐ No

---

B2 Does the course specify the learner population that will engage in the course?

- ☐ Yes  
☐ No

---

B3 Does the course specify the change that needs to be promoted in the skill set of the learner population?

- ☐ Yes  
☐ No

---

B4 To what extent are the course materials well organised?

- ☐ None  
☐ To some extent  
☐ To large extent  
☐ To very large extent  
☐ Not applicable  
☐ No information

---

B5 Are the course enrollment requirements clearly outlined?

- ☐ Yes  
☐ No

---

B6 Are the course completion requirements clearly outlined?

- ☐ Yes  
☐ No

---

## SECTION C

Goal setting

C1 Are distal goals described (at the end of this course...)?

- ☐ No  
☐ Yes, namely:

C2 Are proximal goals described (per week or per activity)?

- ☐ No  
☐ Yes, namely:

---

C3 To what extent are the course objectives measurable?

- ☐ None
- ☐ To some extent
- ☐ To large extent
- ☐ To very large extent
- ☐ Not applicable
- ☐ No information

---

C4 Are students encouraged to make a commitment statement about learning goals or a change in their knowledge, skill set or attitude?

- ☐ Yes
- ☐ No

---

C5 Are students invited to construct or set their own goals?

- ☐ Yes
- ☐ No

---

C6 Are students encouraged to think about possible obstacles that might impede their development in the course?

- ☐ Yes
- ☐ No

Problem-centeredness

---

C7 To what extent do the activities build upon each other?

- ☐ None
- ☐ To some extent
- ☐ To large extent
- ☐ To very large extent
- ☐ No information

---

C8 To what extent are the course objectives relevant to real-world problems?

- ☐ None
- ☐ To some extent
- ☐ To large extent
- ☐ To very large extent
- ☐ Not applicable
- ☐ No information

---

C9 To what extent are the problems in the course typical of those learners will encounter in the real world?

- ☐ None
- ☐ To some extent
- ☐ To large extent
- ☐ To very large extent
- ☐ Not applicable
- ☐ No information

---

C10 To what extent do the activities in the course relate to the participants' real workplace problems?

- ☐ None
  - ☐ To some extent
  - ☐ To large extent
  - ☐ To very large extent
  - ☐ Not applicable
  - ☐ No information
-

C11 To what extent are the problems ill-structured – ie have more than one correct solution?

- ☐ None
- ☐ To some extent
- ☐ To large extent
- ☐ To very large extent
- ☐ Not applicable
- ☐ No information

C12 To what extent are the problems divergent from one another?

- ☐ None
- ☐ To some extent
- ☐ To large extent
- ☐ To very large extent
- ☐ Not applicable
- ☐ No information

Authentic resources

C13 To what extent are the resources reused from real-world settings?

- ☐ None
- ☐ To some extent
- ☐ To large extent
- ☐ To very large extent
- ☐ No information

Activation

C14 To what extent do the activities attempt to activate learners' relevant prior knowledge or experience?

- ☐ None
- ☐ To some extent
- ☐ To large extent
- ☐ To very large extent
- ☐ No information

Application

C15 To what extent do the activities require learners to apply their newly acquired knowledge or skill?

- ☐ None
- ☐ To some extent
- ☐ To large extent
- ☐ To very large extent
- ☐ No information

Integration

C16 To what extent do the activities require learners to integrate the new knowledge or skill into their everyday life or work?

- ☐ None
- ☐ To some extent
- ☐ To large extent
- ☐ To very large extent
- ☐ No information

Differentiation

C17 To what extent are there activity options for participants with various learning needs?

- ☐ None
- ☐ To some extent
- ☐ To large extent
- ☐ To very large extent
- ☐ No information

Demonstration

C18 Are there examples of problem solutions?

- ☐ Yes
- ☐ No
- ☐ Not applicable

C19 If there are examples of solutions, to what extent do these solutions represent a range of quality from excellent examples to poor examples?

- ☐ None
- ☐ To some extent
- ☐ To large extent
- ☐ To very large extent
- ☐ Not applicable
- ☐ No information

Collective knowledge

C20 To what extent do the activities require participants to learn from each other?

- ☐ None
- ☐ To some extent
- ☐ To large extent
- ☐ To very large extent
- ☐ No information

C21 To what extent do the activities require learners to build on other participants' submissions?

- ☐ None
- ☐ To some extent
- ☐ To large extent
- ☐ To very large extent
- ☐ No information

C22 To what extent do the activities require participants to contribute to the collective knowledge, rather than merely consume knowledge?

- ☐ None
- ☐ To some extent
- ☐ To large extent
- ☐ To very large extent
- ☐ Not applicable
- ☐ No information

Feedback

C23 Is there feedback on activities by the instructor(s) in this course?

- ☐ Yes
- ☐ No

C24 If there is feedback, is the way feedback will be provided clearly explained to the participants?

- ☐ Yes
- ☐ No
- ☐ Not applicable

Collaboration

C25 To what extent do the activities require participants to collaborate with other course participants?

- ☐ None
- ☐ To some extent
- ☐ To large extent
- ☐ To very large extent
- ☐ No information

C26 To what extent do the activities require participants to collaborate with others outside the course?

- ☐ None
- ☐ To some extent
- ☐ To large extent
- ☐ To very large extent
- ☐ No information

---

C27 To what extent do the activities require that the peer-interaction groups be comprised of individuals with different backgrounds, opinions, and skills?

- ☐ None
- ☐ To some extent
- ☐ To large extent
- ☐ To very large extent
- ☐ Not applicable
- ☐ No information

---

C28 To what extent can the individual contribution of each learner in the group be clearly identified?

- ☐ None
- ☐ To some extent
- ☐ To large extent
- ☐ To very large extent
- ☐ Not applicable
- ☐ No information

---

C29 Are the peer-interaction groups given specific directions for interaction?

- ☐ Yes
- ☐ No
- ☐ Not applicable

---

C30 Does each member of a peer-interaction group have a specific role to play?

- ☐ Yes
- ☐ No
- ☐ Not applicable



## Appendix C

\*the matching titles can be found in appendix A.

E-Mail: [medicalteacher@dundee.ac.uk](mailto:medicalteacher@dundee.ac.uk) URL: <http://mc.manuscriptcentral.com/CMTE>
